# Supplementary material for: Multi-proxy speleothem-based reconstruction of mid-MIS 3 climate in South Africa
Source: Copernicus journal article supplement (doi:10.5194/cp-19-1847-2023), 2023-09-25
Supplement: Supplementary file 1 [file cp-19-1847-2023-supplement.zip]

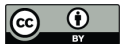

*Supplement of*

**Multi-proxy speleothem-based reconstruction of mid-MIS 3 climate in South Africa**

**Jenny Maccali et al.**

*Correspondence to:* Jenny Maccali ([jenny.maccali@uib.no](mailto:jenny.maccali@uib.no))

- [cp-19-1847-2023-supplement-title-page.pdf](#)
- [Supplementary data.xlsx](#)
- [Supplementary material\\_revised.pdf](#)

The copyright of individual parts of the supplement might differ from the article licence.
