# Supplementary material for: Multi-proxy speleothem-based reconstruction of mid-MIS 3 climate in South Africa
Source: Copernicus journal article supplement (doi:10.5194/cp-19-1847-2023), 2023-09-25
Supplement: Supplementary file 3 [file cp-19-1847-2023-supplement.zip]

Archive with 3 entries (3 files):
- Supplementary data.xlsx
- Supplementary material_revised.pdf
- cp-19-1847-2023-supplement-title-page.pdf
